# Supplementary material for: Expression of Amyloid Precursor Protein, Caveolin-1, Alpha-, Beta-, and Gamma-Secretases in Penumbra Cells after Photothrombotic Stroke and Evaluation of Neuroprotective Effect of Secretase and Caveolin-1 Inhibitors
Source: MDPI journal article supplement (doi:10.3390/biomedicines10102655), 2022-10-20
Supplement: s1 [file s1]

**Table S1. List of primary antibodies Used In This Study**

| <b>antibody</b>                               | <b>company</b>                          | <b>lot number</b> | <b>dilution ratio</b> |
|-----------------------------------------------|-----------------------------------------|-------------------|-----------------------|
| rabbit anti-ADAM-10                           | Moscow branch of Merck (Moscow, Russia) |                   | 1:500                 |
| rabbit anti-C-terminus                        | Moscow branch of Merck (Moscow, Russia) | A2726             | 1:500                 |
| rabbit anti-BACE1                             | Moscow branch of Merck (Moscow, Russia) | SAB2100200        | 1:500                 |
| rabbit anti-nicastrin (ab1)                   | Moscow branch of Merck (Moscow, Russia) | PRS3983           | 1:500                 |
| rabbit anti-presenilin-1                      | Moscow branch of Merck (Moscow, Russia) | PRS4203           | 1:500                 |
| rabbit anti-caveolin-1 (marker of lipid raft) | ABclonal (USA)                          | A19006            | 1:500                 |
| mouse anti-NeuN (marker of neurons)           | Moscow branch of Merck (Moscow, Russia) | MAB377            | 1:1000                |
| rabbit anti-ac-H4                             | Moscow branch of Merck (Moscow, Russia) | 06-866            | 1:500                 |
| rabbit anti-GAPDH                             | Sigma-Aldrich                           | G9545             | 1:1000                |
| mouse anti-caveolin-1 (marker of lipid raft)  | Moscow branch of Merck (Moscow, Russia) | SAB4200216        | 1:500                 |
| mouse anti-GFAP (marker of astrocytes)        | Moscow branch of Merck (Moscow, Russia) | SAB5201104        | 1:1000                |
| rabbit anti-N-APP                             | Sigma-Aldrich                           | SAB4200536        | 1:500                 |
| rabbit anti-C-APP                             | Sigma-Aldrich                           | A8717             | 1:500                 |
| anti- $\beta$ -Amyloid                        | Sigma-Aldrich                           | A8354             | 1:500                 |
| mouse anti- $\beta$ -actin                    | Moscow branch of Merck (Moscow, Russia) | A5441             | 1:5000                |

|                                         |                                         |            |        |
|-----------------------------------------|-----------------------------------------|------------|--------|
| HRP-conjugated goat anti-rabbit IgG-HRP | Moscow branch of Merck (Moscow, Russia) | A6154      | 1:1000 |
| HRP-conjugated goat anti-mouse IgG-HRP  | Amersham                                | NIF825     | 1:1000 |
| secondary anti-rabbit CF488A            | Moscow branch of Merck (Moscow, Russia) | SAB4600045 | 1:1000 |
| secondary anti-mouse CF555              | Moscow branch of Merck (Moscow, Russia) | SAB4600302 | 1:1000 |
